# Supplementary material for: Revealing ultrafast vibronic dynamics of tetracene molecules with sub-8 fs UV impulsive Raman spectroscopy
Source: Royal Society of Chemistry journal article supplement (doi:10.1039/d2cp03572c), 2022-01-01
Supplement: d2cp03572c1.pdf [file d2cp03572c1.pdf]

**Supporting Information for**  
**Revealing ultrafast vibronic dynamics of tetracene molecules with sub-8-fs UV impulsive Raman spectroscopy**

Takahiro Teramoto<sup>1\*</sup>, Jun Liu<sup>2,3</sup>, Juan Du<sup>2,4</sup> and Takayoshi Kobayashi<sup>5,6</sup>

<sup>1</sup>. Institute for Radiation Sciences, Osaka University, 1-1 Machikaneyama-cho, Toyonaka, Osaka 560-0043, Japan

<sup>2</sup>. State Key Laboratory of High Field Laser Physics and CAS Center for Excellence in Ultra-intense Laser Science, Shanghai Institute of Optics and Fine Mechanics (SIOM), Chinese Academy of Sciences (CAS), Shanghai 201800, China

<sup>3</sup>. University Center of Materials Science and Optoelectronics Engineering, University of Chinese Academy of Sciences, Beijing, China

<sup>4</sup>. Hangzhou Institute for Advanced Study, University of Chinese Academy of Sciences, Hangzhou 310024, China

<sup>5</sup>. Advanced Ultrafast Laser Research Center and Brain Science Inspired Science Support Center, The University of Electro-Communications, 1-5-1 Chofugaoka, Chofu 182-8585, Tokyo, Japan

<sup>6</sup>. Department of Electrophysics, National Chiao-Tung University, Hsinchu 300, Taiwan

\*Corresponding author e-mail; [teramoto@irs.osaka-u.ac.jp](mailto:teramoto@irs.osaka-u.ac.jp)

**Table S1.** Calculated vibrational modes of tetracene in S<sub>0</sub> state

| Vibrational Mode | Wave number(cm <sup>-1</sup> ) | IR      | Raman    | Symmetry        |
|------------------|--------------------------------|---------|----------|-----------------|
| 1                | 51.23                          | 1.1833  | 0        | B <sub>3u</sub> |
| 2                | 89.2                           | 0       | 0        | A <sub>u</sub>  |
| 3                | 152.36                         | 0       | 3.9983   | B <sub>1g</sub> |
| 4                | 163                            | 2.6408  | 0        | B <sub>1u</sub> |
| 5                | 193.06                         | 0       | 0.6286   | B <sub>2g</sub> |
| 6                | 278.3                          | 1.4942  | 0        | B <sub>3u</sub> |
| 7                | 307.5                          | 0       | 9.0769   | B <sub>3g</sub> |
| 8                | 317.23                         | 0       | 53.8381  | A <sub>g</sub>  |
| 9                | 327.81                         | 0       | 0        | A <sub>u</sub>  |
| 10               | 389.7                          | 0       | 1.6347   | B <sub>1g</sub> |
| 11               | 451.25                         | 0.0905  | 0        | B <sub>1u</sub> |
| 12               | 475.06                         | 61.6483 | 0        | B <sub>3u</sub> |
| 13               | 485.62                         | 0       | 12.5719  | B <sub>1g</sub> |
| 14               | 500.75                         | 0       | 83.0758  | B <sub>3g</sub> |
| 15               | 501.59                         | 2.8437  | 0        | B <sub>3u</sub> |
| 16               | 527.01                         | 0       | 0.4744   | B <sub>2g</sub> |
| 17               | 557.96                         | 22.8057 | 0        | B <sub>2u</sub> |
| 18               | 571.98                         | 0       | 0        | A <sub>U</sub>  |
| 19               | 611.56                         | 3.672   | 0        | B <sub>1u</sub> |
| 20               | 625.42                         | 0       | 18.5383  | A <sub>g</sub>  |
| 21               | 634.32                         | 1.8407  | 0        | B <sub>2u</sub> |
| 22               | 749.94                         | 0       | 0.1819   | B <sub>2g</sub> |
| 23               | 752.24                         | 0       | 9.4406   | B <sub>1g</sub> |
| 24               | 756.15                         | 0.5233  | 0        | B <sub>2u</sub> |
| 25               | 765.34                         | 0       | 445.9083 | A <sub>g</sub>  |

|    |         |          |          |                 |
|----|---------|----------|----------|-----------------|
| 26 | 766.08  | 154.7376 | 0        | B <sub>3u</sub> |
| 27 | 775.85  | 0        | 1.6138   | B <sub>3g</sub> |
| 28 | 785.15  | 0        | 0        | A <sub>u</sub>  |
| 29 | 787.86  | 0        | 0.5394   | B <sub>2g</sub> |
| 30 | 854.96  | 0        | 0        | A <sub>u</sub>  |
| 31 | 866.57  | 0        | 0.3124   | B <sub>2g</sub> |
| 32 | 872.57  | 0        | 5.9719   | A <sub>g</sub>  |
| 33 | 886.12  | 0        | 0.2471   | B <sub>1g</sub> |
| 34 | 895.52  | 0        | 1.7837   | B <sub>3g</sub> |
| 35 | 913.37  | 0        | 0        | A <sub>u</sub>  |
| 36 | 929.29  | 4.2219   | 0        | B <sub>1u</sub> |
| 37 | 936.53  | 119.5096 | 0        | B <sub>3u</sub> |
| 38 | 937.49  | 0        | 13.5505  | B <sub>2g</sub> |
| 39 | 989.04  | 0        | 26.7823  | B <sub>1g</sub> |
| 40 | 989.47  | 15.0724  | 0        | B <sub>3u</sub> |
| 41 | 1011.01 | 0        | 11.2552  | B <sub>2g</sub> |
| 42 | 1011.83 | 0        | 0        | A <sub>U</sub>  |
| 43 | 1013.08 | 23.4053  | 0        | B <sub>2u</sub> |
| 44 | 1016.13 | 0        | 245.4923 | A <sub>g</sub>  |
| 45 | 1124.25 | 1.8438   | 0        | B <sub>2u</sub> |
| 46 | 1142.53 | 13.3833  | 0        | B <sub>1u</sub> |
| 47 | 1144.93 | 0        | 0.4102   | B <sub>3g</sub> |
| 48 | 1170.91 | 0        | 109.2491 | A <sub>g</sub>  |
| 49 | 1178.02 | 0.8815   | 0        | B <sub>2u</sub> |
| 50 | 1190.63 | 0        | 297.3627 | B <sub>3g</sub> |
| 51 | 1213.79 | 2.1575   | 0        | B <sub>1u</sub> |
| 52 | 1222.8  | 0        | 924.5528 | A <sub>g</sub>  |

|    |         |         |          |                 |
|----|---------|---------|----------|-----------------|
| 53 | 1283.47 | 0       | 0.6285   | B <sub>3g</sub> |
| 54 | 1295.73 | 1.3931  | 0        | B <sub>1u</sub> |
| 55 | 1314.02 | 13.9203 | 0        | B <sub>1u</sub> |
| 56 | 1320.76 | 1.4555  | 0        | B <sub>2u</sub> |
| 57 | 1346.98 | 15.6415 | 0        | B <sub>2u</sub> |
| 58 | 1348.12 | 0       | 5.3757   | B <sub>3g</sub> |
| 59 | 1402.15 | 3.3937  | 0        | B <sub>1u</sub> |
| 60 | 1425.16 | 0       | 6061.727 | A <sub>g</sub>  |
| 61 | 1441.81 | 0       | 956.092  | A <sub>g</sub>  |
| 62 | 1452.92 | 6.7918  | 0        | B <sub>2u</sub> |
| 63 | 1469.55 | 0       | 13.2278  | B <sub>3g</sub> |
| 64 | 1470.66 | 0       | 3653.623 | A <sub>g</sub>  |
| 65 | 1492.39 | 3.8456  | 0        | B <sub>2u</sub> |
| 66 | 1561.06 | 0       | 45.8382  | A <sub>g</sub>  |
| 67 | 1590.57 | 13.2701 | 0        | B <sub>2u</sub> |
| 68 | 1593.14 | 0       | 1111.578 | A <sub>g</sub>  |
| 69 | 1607.05 | 0.4127  | 0        | B <sub>1u</sub> |
| 70 | 1656.81 | 0       | 232.5159 | B <sub>3g</sub> |
| 71 | 1670.19 | 0       | 563.5572 | B <sub>3g</sub> |
| 72 | 1681.82 | 6.6529  | 0        | B <sub>1u</sub> |
| 73 | 3184.53 | 0       | 13.3233  | B <sub>3g</sub> |
| 74 | 3185.57 | 9.2356  | 0        | B <sub>1u</sub> |
| 75 | 3186.09 | 2.1054  | 0        | B <sub>2u</sub> |
| 76 | 3187.22 | 0       | 540.1064 | A <sub>g</sub>  |
| 77 | 3187.46 | 0       | 4.5357   | B <sub>3g</sub> |
| 78 | 3187.67 | 9.518   | 0        | B <sub>1u</sub> |
| 79 | 3190.55 | 5.2398  | 0        | B <sub>2u</sub> |

|    |         |         |          |                 |
|----|---------|---------|----------|-----------------|
| 80 | 3190.67 | 0       | 714.1974 | A <sub>g</sub>  |
| 81 | 3205.59 | 36.8289 | 0        | B <sub>1u</sub> |
| 82 | 3205.65 | 0       | 483.7045 | B <sub>3g</sub> |
| 83 | 3217.1  | 37.8934 | 0        | B <sub>2u</sub> |
| 84 | 3217.19 | 0       | 1531.766 | A <sub>g</sub>  |

**Table S2.** Calculated vibrational modes of tetracene in S<sub>1</sub> state

| Vibrational Mode | Wave number(cm <sup>-1</sup> ) | IR      | Raman    | Symmetry        |
|------------------|--------------------------------|---------|----------|-----------------|
| 1                | 47.05                          | 1.4707  | 0.0057   | B <sub>3u</sub> |
| 2                | 81.03                          | 0.0000  | 1.2564   | A <sub>u</sub>  |
| 3                | 144.56                         | 0.0000  | 9.4165   |                 |
| 4                | 157.02                         | 2.8685  | 0.0373   |                 |
| 5                | 188.47                         | 0.0000  | 2.1707   | B <sub>2g</sub> |
| 6                | 281.95                         | 2.1365  | 0.9397   | B <sub>3g</sub> |
| 7                | 299.45                         | 0.0000  | 96.5829  | B <sub>3g</sub> |
| 8                | 308.94                         | 0.0000  | 5.0492   | B <sub>3g</sub> |
| 9                | 314.12                         | 0.0000  | 886.9173 | A <sub>g</sub>  |
| 10               | 354.33                         | 0.0000  | 11.6684  | B <sub>1g</sub> |
| 11               | 432.53                         | 44.2171 | 3.3058   | B <sub>3u</sub> |
| 12               | 444.50                         | 1.0524  | 0.1223   |                 |
| 13               | 469.92                         | 8.6656  | 9.5597   |                 |
| 14               | 471.04                         | 0.0000  | 21.2827  |                 |
| 15               | 487.33                         | 0.0012  | 13.1906  |                 |
| 16               | 543.82                         | 0.0002  | 0.2921   |                 |
| 17               | 549.34                         | 53.4212 | 0.0136   |                 |
| 18               | 558.08                         | 0.0001  | 0.4984   |                 |

|    |         |          |           |                 |
|----|---------|----------|-----------|-----------------|
| 19 | 606.86  | 25.2423  | 0.3444    |                 |
| 20 | 616.44  | 0.0094   | 5.5898    |                 |
| 21 | 616.72  | 0.0938   | 0.7375    |                 |
| 22 | 728.67  | 0.0000   | 0.4597    | B <sub>2g</sub> |
| 23 | 742.31  | 0.0000   | 208.2723  | B <sub>1g</sub> |
| 24 | 745.67  | 172.5310 | 0.7359    | B <sub>3u</sub> |
| 25 | 754.62  | 0.0001   | 134.7290  |                 |
| 26 | 756.68  | 0.0000   | 3.0530    |                 |
| 27 | 764.33  | 172.0530 | 0.0631    | B <sub>2u</sub> |
| 28 | 774.38  | 0.0000   | 7.0086    |                 |
| 29 | 779.15  | 0.0001   | 0.8461    |                 |
| 30 | 812.09  | 0.0000   | 1.1924    | A <sub>u</sub>  |
| 31 | 853.92  | 0.0000   | 1.8400    | B <sub>2g</sub> |
| 32 | 854.90  | 0.0000   | 283.0582  | B <sub>1g</sub> |
| 33 | 882.15  | 0.0000   | 3732.6041 |                 |
| 34 | 885.85  | 0.0003   | 19.8547   |                 |
| 35 | 898.22  | 0.0000   | 2.8756    | A <sub>u</sub>  |
| 36 | 902.36  | 108.8222 | 1.5273    | B <sub>3u</sub> |
| 37 | 924.40  | 0.0000   | 31.5746   |                 |
| 38 | 925.52  | 0.0256   | 0.1107    |                 |
| 39 | 950.52  | 0.0000   | 77.6866   | B <sub>1g</sub> |
| 40 | 950.73  | 31.7649  | 0.0617    | B <sub>3u</sub> |
| 41 | 990.80  | 0.0000   | 1.2022    | B <sub>2g</sub> |
| 42 | 991.21  | 0.0000   | 0.2091    | A <sub>u</sub>  |
| 43 | 1045.47 | 39.6691  | 0.1226    |                 |
| 44 | 1046.61 | 0.0020   | 2895.6678 |                 |
| 45 | 1120.23 | 11.0918  | 0.0847    |                 |

|    |         |         |             |                 |
|----|---------|---------|-------------|-----------------|
| 46 | 1123.85 | 0.0006  | 550.9574    |                 |
| 47 | 1158.01 | 12.6696 | 0.0242      | B <sub>2u</sub> |
| 48 | 1168.91 | 0.0002  | 581.3734    |                 |
| 49 | 1171.83 | 0.0004  | 25.2331     |                 |
| 50 | 1187.34 | 39.6199 | 0.0947      |                 |
| 51 | 1225.27 | 0.2981  | 0.0366      |                 |
| 52 | 1238.19 | 0.0001  | 27144.0069  | A <sub>g</sub>  |
| 53 | 1281.20 | 0.0002  | 3.4485      |                 |
| 54 | 1298.32 | 20.0610 | 0.0352      |                 |
| 55 | 1298.48 | 1.3128  | 0.6302      |                 |
| 56 | 1302.31 | 16.0362 | 0.5426      |                 |
| 57 | 1316.10 | 0.0001  | 0.5656      |                 |
| 58 | 1353.91 | 5.1321  | 0.1819      |                 |
| 59 | 1403.25 | 0.0000  | 9872.3271   |                 |
| 60 | 1411.44 | 17.0556 | 0.0336      |                 |
| 61 | 1412.49 | 6.2387  | 0.2245      |                 |
| 62 | 1451.29 | 0.0018  | 166956.2251 |                 |
| 63 | 1457.58 | 0.0008  | 459.3484    |                 |
| 64 | 1469.90 | 0.0000  | 462.2450    | A <sub>g</sub>  |
| 65 | 1509.47 | 99.9146 | 117.3624    |                 |
| 66 | 1509.67 | 61.2058 | 197.6797    |                 |
| 67 | 1543.04 | 4.8955  | 0.2126      |                 |
| 68 | 1546.41 | 0.0002  | 22419.4896  |                 |
| 69 | 1578.90 | 19.0928 | 1.1560      |                 |
| 70 | 1593.12 | 0.0006  | 26397.2259  |                 |
| 71 | 1616.36 | 0.0000  | 3569.8545   |                 |
| 72 | 1631.59 | 2.2376  | 0.3695      |                 |

|    |         |         |           |                 |
|----|---------|---------|-----------|-----------------|
| 73 | 3182.02 | 0.0015  | 201.5648  |                 |
| 74 | 3182.56 | 8.6119  | 0.1826    |                 |
| 75 | 3184.09 | 14.6100 | 0.1788    |                 |
| 76 | 3184.99 | 0.0039  | 615.4750  |                 |
| 77 | 3190.07 | 0.0000  | 250.1573  | B <sub>3g</sub> |
| 78 | 3190.12 | 11.2245 | 0.0620    | B <sub>1u</sub> |
| 79 | 3192.82 | 0.0047  | 3003.4783 |                 |
| 80 | 3192.84 | 0.3594  | 40.4598   |                 |
| 81 | 3207.62 | 0.0176  | 1342.0560 |                 |
| 82 | 3207.63 | 22.7657 | 1.0990    |                 |
| 83 | 3221.53 | 84.8577 | 0.0024    | B <sub>2u</sub> |
| 84 | 3221.77 | 0.0000  | 3110.6213 | A <sub>g</sub>  |



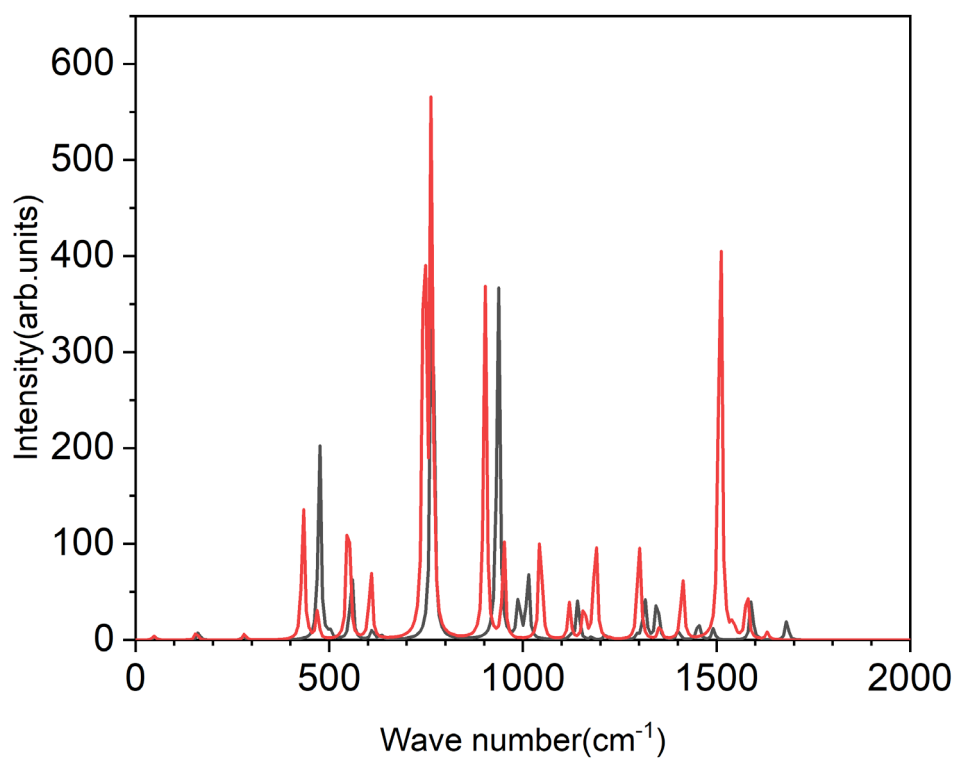

**Fig. S1.** Simulated IR absorption spectra of tetracene in the S<sub>0</sub> (black) and S<sub>1</sub> (red) state

**Tables S3 Shift vector and Huang Rhys factors**

| Vibrational mode # | Shift Vector(atomic units) | Huang-Rhys Factor |
|--------------------|----------------------------|-------------------|
| 1                  | -8.37599E-14               | 8.18743E-31       |
| 2                  | 1.21136E-11                | 2.98197E-26       |
| 3                  | 6.07627E-14                | 1.28151E-30       |
| 4                  | -8.04812E-10               | 2.40533E-22       |
| 5                  | -4.29316E-12               | 8.10641E-27       |
| 6                  | -7.91445E-13               | 3.97137E-28       |
| 7                  | -1.49528E-8                | 1.56628E-19       |
| 8                  | 19.1527                    | 0.26511           |
| 9                  | -1.69344E-10               | 2.14167E-23       |
| 10                 | 3.46674E-13                | 1.06698E-28       |
| 11                 | 5.98357E-10                | 3.68062E-22       |
| 12                 | 5.3822E-14                 | 3.13511E-30       |
| 13                 | -1.59743E-12               | 2.82309E-27       |
| 14                 | 4.22089E-10                | 2.03245E-22       |
| 15                 | 4.2301E-13                 | 2.04472E-28       |
| 16                 | -1.50519E-12               | 2.7201E-27        |
| 17                 | -1.43402E-6                | 2.61396E-15       |
| 18                 | 3.54531E-12                | 1.63786E-26       |
| 19                 | -2.01439E-9                | 5.65342E-21       |
| 20                 | -4.79052                   | 0.0327            |
| 21                 | -1.60201E-5                | 3.7087E-13        |
| 22                 | -6.06203E-11               | 6.27834E-24       |
| 23                 | 2.2803E-13                 | 8.91096E-29       |
| 24                 | 8.43228E-6                 | 1.22486E-13       |
| 25                 | -4.73334                   | 0.03906           |
| 26                 | -1.14476E-11               | 2.28711E-25       |
| 27                 | 5.48662E-10                | 5.32072E-22       |
| 28                 | 7.87954E-11                | 1.11056E-23       |
| 29                 | -2.83389E-11               | 1.44146E-24       |
| 30                 | -3.95721E-12               | 3.05006E-26       |
| 31                 | -2.70074E-12               | 1.43997E-26       |
| 32                 | 1.30927                    | 0.00341           |
| 33                 | 8.54559E-13                | 1.47421E-27       |

|    |              |             |
|----|--------------|-------------|
| 34 | 1.95315E-10  | 7.78274E-23 |
| 35 | 1.3357E-11   | 3.71236E-25 |
| 36 | -2.55451E-11 | 1.3815E-24  |
| 37 | -1.48182E-13 | 4.68487E-29 |
| 38 | 2.38449E-12  | 1.21435E-26 |
| 39 | 5.22064E-13  | 6.14108E-28 |
| 40 | -6.28109E-14 | 8.89319E-30 |
| 41 | -1.31561E-12 | 3.98655E-27 |
| 42 | -8.84038E-11 | 1.80151E-23 |
| 43 | -4.49712E-7  | 4.66763E-16 |
| 44 | 2.35152      | 0.0128      |
| 45 | 4.51763E-6   | 5.22723E-14 |
| 46 | 4.8733E-10   | 6.18161E-22 |
| 47 | -1.21882E-9  | 3.87476E-21 |
| 48 | -5.28587     | 0.07453     |
| 49 | -7.05262E-7  | 1.33487E-15 |
| 50 | 3.47437E-9   | 3.27427E-20 |
| 51 | -1.03858E-8  | 2.98271E-19 |
| 52 | -7.03686     | 0.13794     |
| 53 | -2.33045E-10 | 1.588E-22   |
| 54 | 1.3244E-9    | 5.17768E-21 |
| 55 | 3.08875E-10  | 2.85597E-22 |
| 56 | -1.10706E-5  | 3.68768E-13 |
| 57 | -3.19587E-6  | 3.13419E-14 |
| 58 | 6.43545E-10  | 1.27196E-21 |
| 59 | 2.73909E-10  | 2.39658E-22 |
| 60 | -11.2344     | 0.40977     |
| 61 | 3.7612       | 0.04647     |
| 62 | 1.95986E-6   | 1.27138E-14 |
| 63 | 4.3036E-9    | 6.20061E-20 |
| 64 | 5.27251      | 0.09314     |
| 65 | -1.26216E-5  | 5.41618E-13 |
| 66 | 0.28874      | 2.96504E-4  |
| 67 | 2.95815E-5   | 3.17087E-12 |
| 68 | 7.96306      | 0.23014     |

|    |              |             |
|----|--------------|-------------|
| 69 | -2.44084E-9  | 2.18119E-20 |
| 70 | -1.00559E-9  | 3.81678E-21 |
| 71 | 1.43262E-9   | 7.80935E-21 |
| 72 | -1.44789E-9  | 8.03223E-21 |
| 73 | -1.25588E-10 | 1.14426E-22 |
| 74 | 1.58124E-10  | 1.81454E-22 |
| 75 | 1.16075E-8   | 9.77956E-19 |
| 76 | -0.02011     | 2.93757E-6  |
| 77 | 5.36044E-10  | 2.08656E-21 |
| 78 | -4.63568E-10 | 1.56058E-21 |
| 79 | 4.40999E-9   | 1.4136E-19  |
| 80 | -0.01902     | 2.62937E-6  |
| 81 | 4.09889E-11  | 1.22695E-23 |
| 82 | -4.32221E-11 | 1.36431E-23 |
| 83 | 5.4607E-9    | 2.18548E-19 |
| 84 | -0.16915     | 2.09701E-4  |

**Table S4 Diagonal components in Duschninsky matrix**

| Vibrational mode in $S_0$ state | Vibrational mode in $S_1$ state | $J_{ij}^2$ |
|---------------------------------|---------------------------------|------------|
| 3                               | 3                               | 0.98789    |
| 7                               | 7                               | 0.9613     |
| 10                              | 10                              | 0.98543    |
| 13                              | 13                              | 0.93789    |
| 16                              | 16                              | 0.97678    |
| 18                              | 18                              | 0.95171    |
| 20                              | 20                              | 0.9896     |
| 22                              | 22                              | 0.97777    |
| 23                              | 23                              | 0.97383    |
| 29                              | 29                              | 0.98032    |
| 30                              | 30                              | 0.71493    |
| 31                              | 31                              | 0.93434    |
| 35                              | 35                              | 0.80159    |

|    |    |         |
|----|----|---------|
| 38 | 38 | 0.95919 |
| 39 | 39 | 0.98273 |
| 40 | 40 | 0.98379 |
| 41 | 41 | 0.93942 |
| 42 | 42 | 0.93987 |
| 43 | 43 | 0.92097 |
| 44 | 44 | 0.95999 |
| 48 | 48 | 0.97125 |
| 51 | 51 | 0.91947 |
| 52 | 52 | 0.94598 |
| 53 | 53 | 0.70676 |
| 55 | 55 | 0.87753 |
| 57 | 57 | 0.7261  |
| 63 | 63 | 0.87654 |
| 64 | 64 | 0.529   |
| 68 | 68 | 0.19835 |
| 71 | 71 | 0.23526 |
| 72 | 72 | 0.94698 |
| 73 | 73 | 0.86961 |

**Table S5 Off-diagonal components in Duschninsky matrix**

| Vibrational mode in $S_0$<br>state | Vibrational mode in $S_1$<br>state | $J_{ij}^2$ |
|------------------------------------|------------------------------------|------------|
| 9                                  | 8                                  | 0.93605    |
| 12                                 | 11                                 | 0.90055    |
| 15                                 | 14                                 | 0.83501    |
| 21                                 | 19                                 | 0.98723    |
| 24                                 | 27                                 | 0.97924    |
| 26                                 | 24                                 | 0.96667    |
| 28                                 | 26                                 | 0.86212    |
| 28                                 | 30                                 | 0.12791    |
| 30                                 | 26                                 | 0.10818    |
| 30                                 | 35                                 | 0.13111    |
| 33                                 | 32                                 | 0.98314    |
| 35                                 | 30                                 | 0.1256     |

|    |    |         |
|----|----|---------|
| 37 | 36 | 0.93079 |
| 45 | 47 | 0.43617 |
| 45 | 50 | 0.4677  |
| 46 | 45 | 0.95802 |
| 47 | 46 | 0.91201 |
| 49 | 47 | 0.48825 |
| 49 | 50 | 0.45396 |
| 50 | 49 | 0.88229 |
| 53 | 57 | 0.25139 |
| 54 | 56 | 0.94862 |
| 56 | 54 | 0.66086 |
| 56 | 58 | 0.2664  |
| 57 | 53 | 0.20966 |
| 58 | 61 | 0.83563 |
| 59 | 60 | 0.97438 |
| 60 | 62 | 0.96523 |
| 61 | 59 | 0.52852 |
| 61 | 64 | 0.37705 |
| 62 | 54 | 0.21466 |
| 62 | 58 | 0.55721 |
| 62 | 69 | 0.15712 |
| 64 | 59 | 0.19194 |
| 64 | 68 | 0.17736 |
| 65 | 66 | 0.82975 |
| 65 | 69 | 0.14702 |
| 66 | 59 | 0.18724 |
| 66 | 68 | 0.59328 |
| 66 | 70 | 0.11251 |
| 67 | 58 | 0.12615 |
| 67 | 66 | 0.13568 |
| 67 | 69 | 0.68817 |
| 68 | 70 | 0.79033 |
| 69 | 67 | 0.9559  |
| 70 | 65 | 0.2244  |
| 70 | 71 | 0.69609 |

|    |    |         |
|----|----|---------|
| 71 | 65 | 0.72051 |
| 73 | 77 | 0.12872 |
| 74 | 75 | 0.55496 |
| 74 | 78 | 0.43978 |
| 76 | 73 | 0.13025 |
| 76 | 77 | 0.86315 |
| 77 | 75 | 0.44482 |
| 77 | 78 | 0.55104 |
| 78 | 76 | 0.98683 |
| 79 | 80 | 0.98846 |
| 80 | 79 | 0.97756 |
| 81 | 82 | 0.96176 |
| 82 | 81 | 0.96283 |

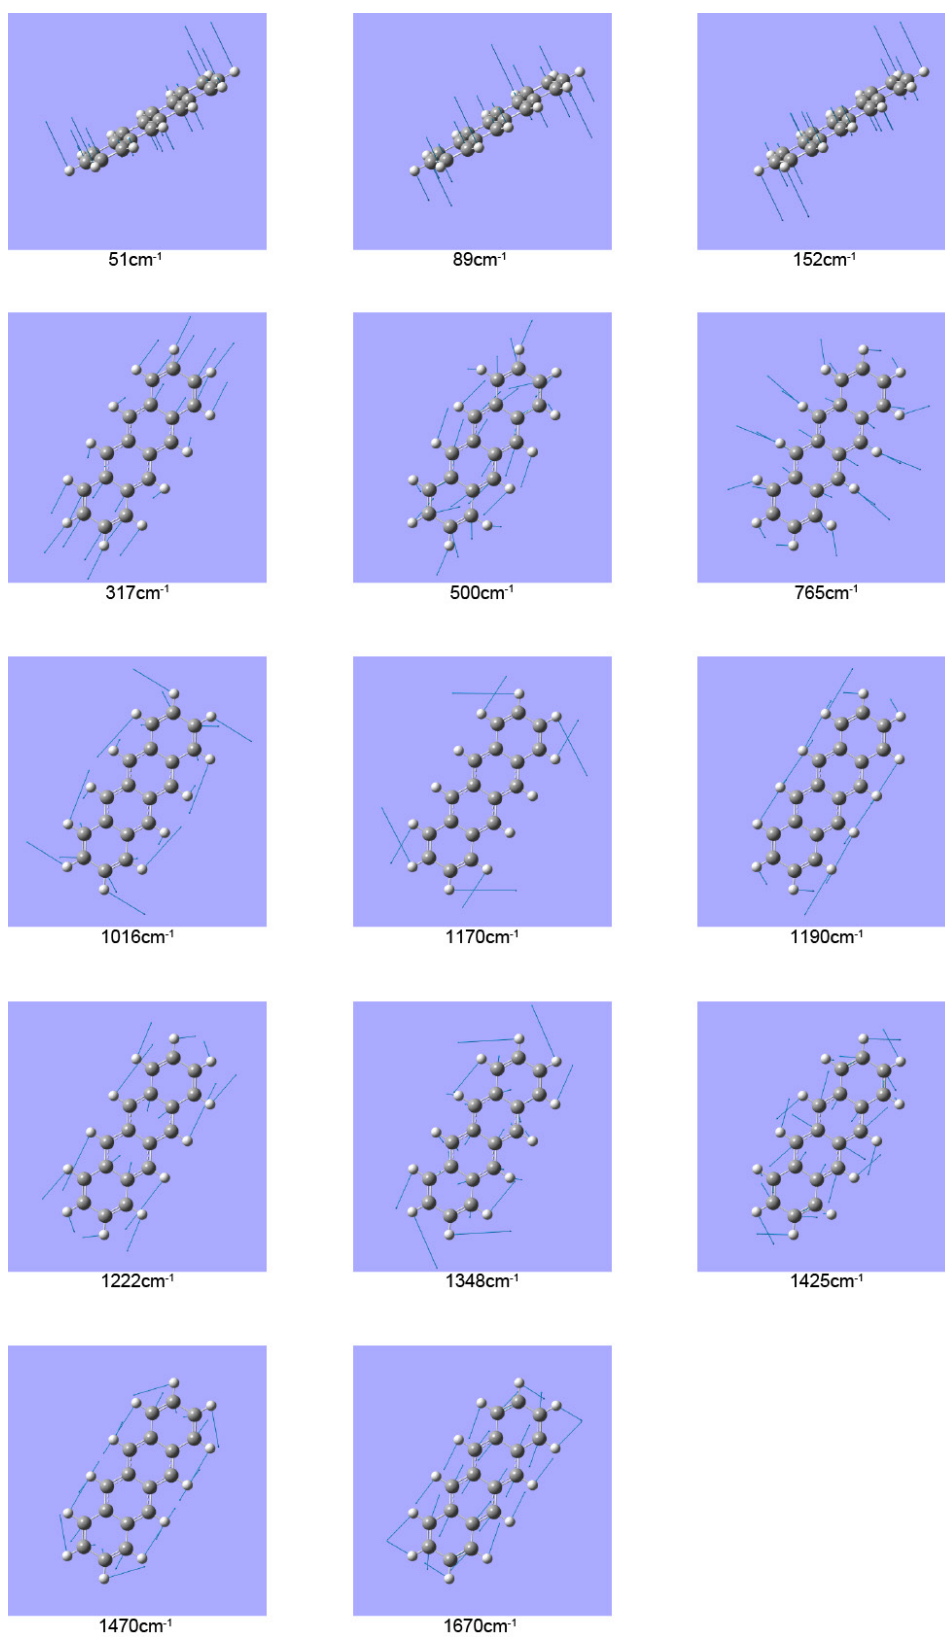

**Fig. S2.** Vibrational modes of tetracene in S<sub>0</sub> state



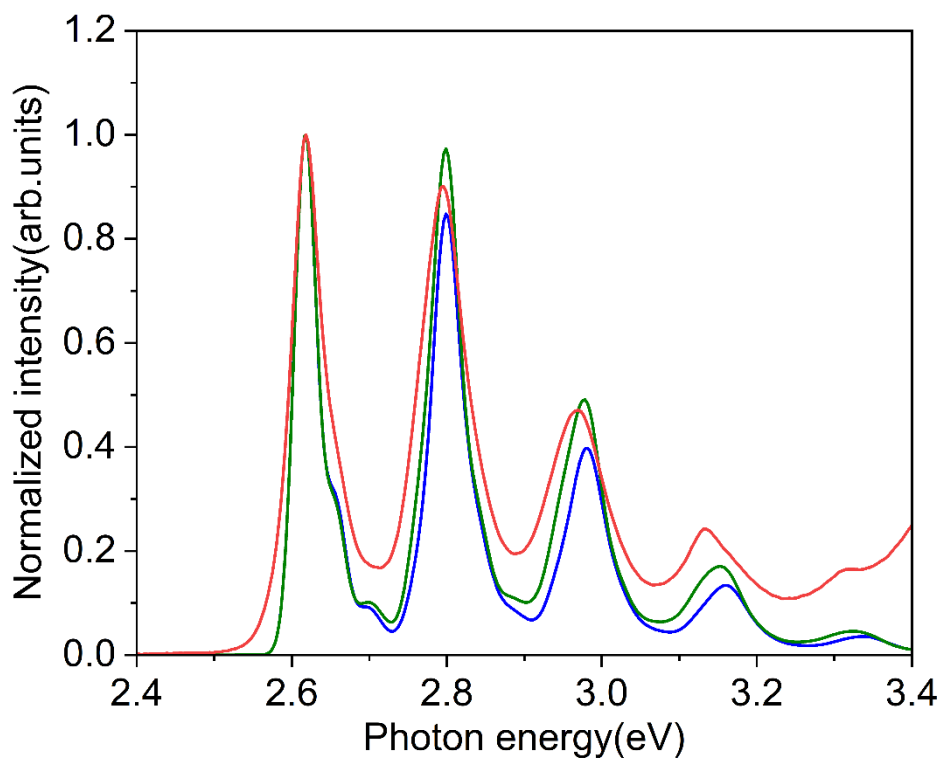

**Fig. S3.** Simulated vibronic spectra of tetracene in THF solution with FCHT approximation. Experimental result of stationary absorption spectra(Red). The simulation with Duschinsky matrix (Blue) and simulation with identity matrix instead of Duschinsky matrix(Green).

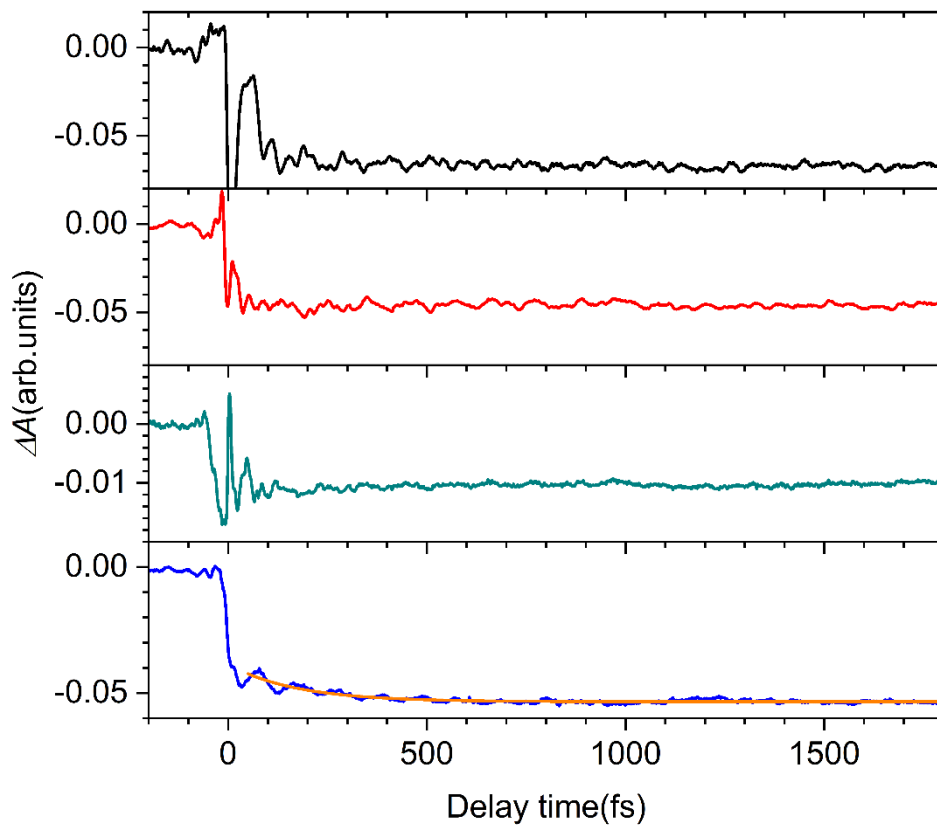

**Fig. S4.** Real time trace of  $\Delta A$  of tetracene in THF solution. The traces are the same as in Fig.5(b). The result of exponential fitting is also described in the figure(orange line)

(a)

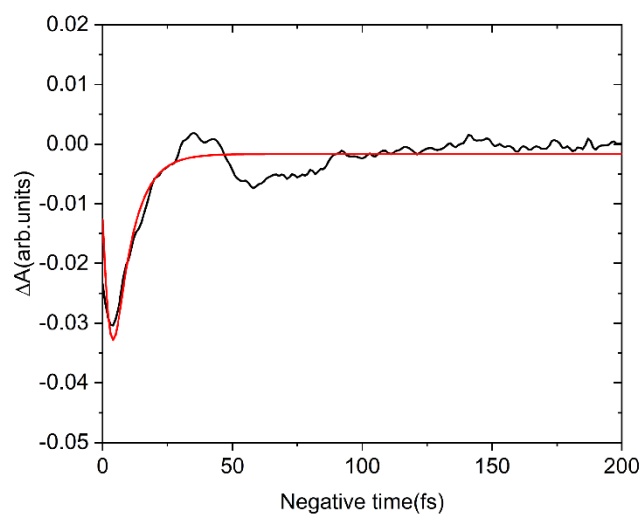

(b)

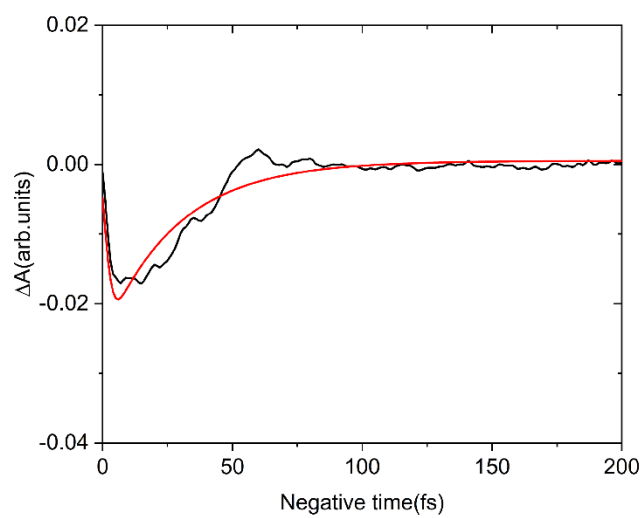

**Fig. S5.** Perturbed free induction decay signal in the negative time region. Fitting with the convolution of Gaussian function(FWHM 7.5fs) and exponential decay was applied to the time traces of  $\Delta A$  at the photon energy of (a) 3.279eV and (b) 3.320eV, respectively.

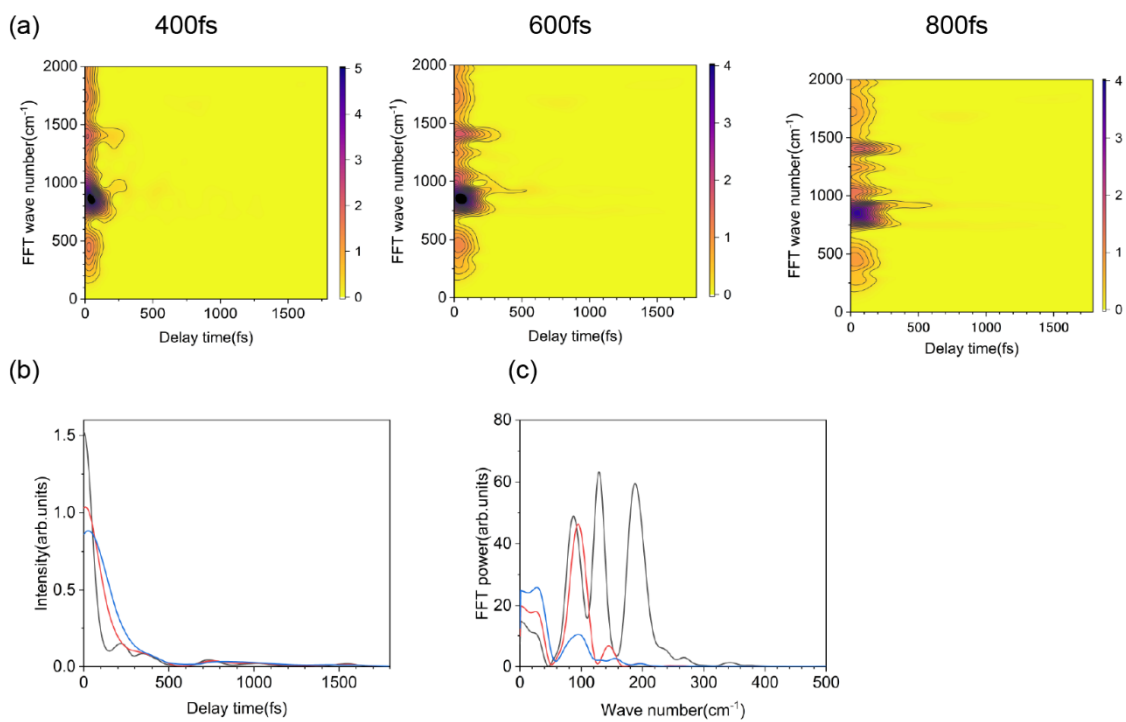

**Fig. S6.** Spectrogram of tetracene at photon energy of 3.11 eV. (a) The spectrograms with window width of 400, 600 and 800 fs are shown (from left to right). (b) Time trace of peak tracking at 1240 cm<sup>-1</sup> signal with 400 (black) 600 (red) and 800 (blue) fs time window. (c) FFT spectra of (b).
